# Supplementary material for: Enantiomer-Selective Characterization of the Adsorption, Dissipation, and Phytotoxicity of the Plant Monoterpene Pulegone in Soils
Source: MDPI journal article supplement (doi:10.3390/plants11101296), 2022-05-12
Supplement: s1 [file s1]

## Supplementary material

### Enantiomer-selective characterization of the adsorption, dissipation, and phytotoxicity of the plant monoterpene pulegone in soils

Jose A. Galán-Pérez<sup>1</sup>, Beatriz Gámiz<sup>1,\*</sup>, Ivana Pavlovic<sup>2</sup>, Rafael Celis<sup>1</sup>

<sup>1</sup> *Instituto de Recursos Naturales y Agrobiología de Sevilla (IRNAS), CSIC, Avenida Reina Mercedes 10, 41012 Sevilla, Spain*

<sup>2</sup> *Departamento de Química Inorgánica, Instituto Universitario de Investigación en Química Fina y Nanoquímica (IUIQFN), Universidad de Córdoba, Campus de Rabanales, 14071 Córdoba, Spain*

**\*Corresponding Author:** B. Gámiz

**Address:** Instituto de Recursos Naturales y Agrobiología de Sevilla (IRNAS), CSIC

Avenida Reina Mercedes 10, 41012 Seville, Spain

**E-mail:** bgamiz@irnase.csic.es

**Text S1.** Description of the different treatments conducted to assess the effect of the application rate, soil water content, temperature/aeration, and the addition of OHT on the dissipation of pulegone enantiomers in non-sterilized soil 2.

i) Application rate: Triplicate samples of 3 g of soil were spiked with 0.9 mL of an aqueous solution of rac-pulegone at different concentrations (6, 30, or 150 mg L<sup>-1</sup>) to give application rates of 2, 9 and 45 mg kg<sup>-1</sup> soil and a soil water content of 30%. The samples were incubated in closed tubes at 25 °C for 4 days.

ii) Soil water content: Triplicate samples of 3 g of soil were spiked with 0.3 mL of a 90 mg L<sup>-1</sup> aqueous solution of rac-pulegone plus 0, 0.6 or 0.9 mL of water, to reach a rac-pulegone application rate of 9 mg kg<sup>-1</sup> and soil water contents of 10, 30, or 40%, respectively. The samples were incubated in closed tubes at 25 °C for 4 days.

iii) Temperature/aeration: Triplicate samples of 3 g of soil were spiked with 0.9 mL of a 30 mg L<sup>-1</sup> aqueous solution of rac-pulegone to give an application rate of 9 mg kg<sup>-1</sup> soil and a water content of 30%. The samples were incubated in closed tubes at 4°C, closed tubes at 25°C, or open tubes at 25°C for 4 days. For the open tube-treatment the soil water content was re-adjusted daily to the initial value of 30%.

iv) Addition of OHT: Triplicate samples of 1 g of soil, either unamended or amended with 10 mg of OHT, were spiked with 0.3 mL of a 150 mg L<sup>-1</sup> aqueous solution of rac-pulegone. The samples were incubated either in closed or open tubes at 25°C for 4 days.

For all treatments, independent triplicate tubes were taken from the incubator at selected times (t= 0, 1, 2, 3, and 4 days), and frozen for subsequent extraction as described in the main text.

**Table S1.** Pearson correlation coefficients (r) between the pulegone  $K_d$  values on the soils (n = 8) and relevant soil properties. Statistically significant ( $P < 0.05$ ) correlations are highlighted in bold.

| Soil<br>property  | Pearson correlation<br>coefficient (r) | <i>P</i> value |
|-------------------|----------------------------------------|----------------|
| <b>Sand</b>       | <b>-0.766</b>                          | <b>0.027</b>   |
| Silt              | 0.468                                  | 0.242          |
| Clay              | 0.690                                  | 0.058          |
| CaCO <sub>3</sub> | 0.388                                  | 0.342          |
| <b>OC</b>         | <b>0.735</b>                           | <b>0.038</b>   |
| pH                | -0.168                                 | 0.690          |

**Table S2.** Paramaters resulting from fitting a sigmoidal 3-parameter equation to the R- and S-pulegone dissipation data in non-autoclaved soils.

| Soil | R-pulegone     |                |                  |                | S-pulegone     |                |                  |                |
|------|----------------|----------------|------------------|----------------|----------------|----------------|------------------|----------------|
|      | C <sub>0</sub> | b              | DT <sub>50</sub> | R <sup>2</sup> | C <sub>0</sub> | b              | DT <sub>50</sub> | R <sup>2</sup> |
| 1    | 4.06 ± 0.05    | -0.240 ± 0.015 | 1.47 ± 0.03      | 1.000          | 4.23 ± 0.06    | -0.257 ± 0.019 | 1.55 ± 0.04      | 0.999          |
| 2    | 4.39 ± 0.06    | -0.337 ± 0.032 | 1.82 ± 0.03      | 0.999          | 4.39 ± 0.09    | -0.306 ± 0.039 | 1.96 ± 0.06      | 0.998          |
| 3    | 4.22 ± 0.21    | -0.205 ± 0.072 | 0.91 ± 0.05      | 0.996          | 5.18 ± 0.59    | -0.621 ± 0.122 | 1.16 ± 0.21      | 0.993          |
| 6    | 4.36 ± 0.01    | -0.160 ± 0.001 | 0.76 ± 0.01      | 1.000          | 4.70 ± 0.22    | -0.353 ± 0.062 | 1.15 ± 0.06      | 0.996          |
| 7    | 4.15 ± 0.04    | -0.183 ± 0.011 | 0.83 ± 0.01      | 1.000          | 4.34 ± 0.04    | -0.251 ± 0.014 | 0.96 ± 0.01      | 1.000          |
| 8    | 4.20 ± 0.01    | -0.260 ± 0.001 | 1.21 ± 0.01      | 1.000          | 4.28 ± 0.01    | -0.246 ± 0.003 | 1.33 ± 0.01      | 1.000          |

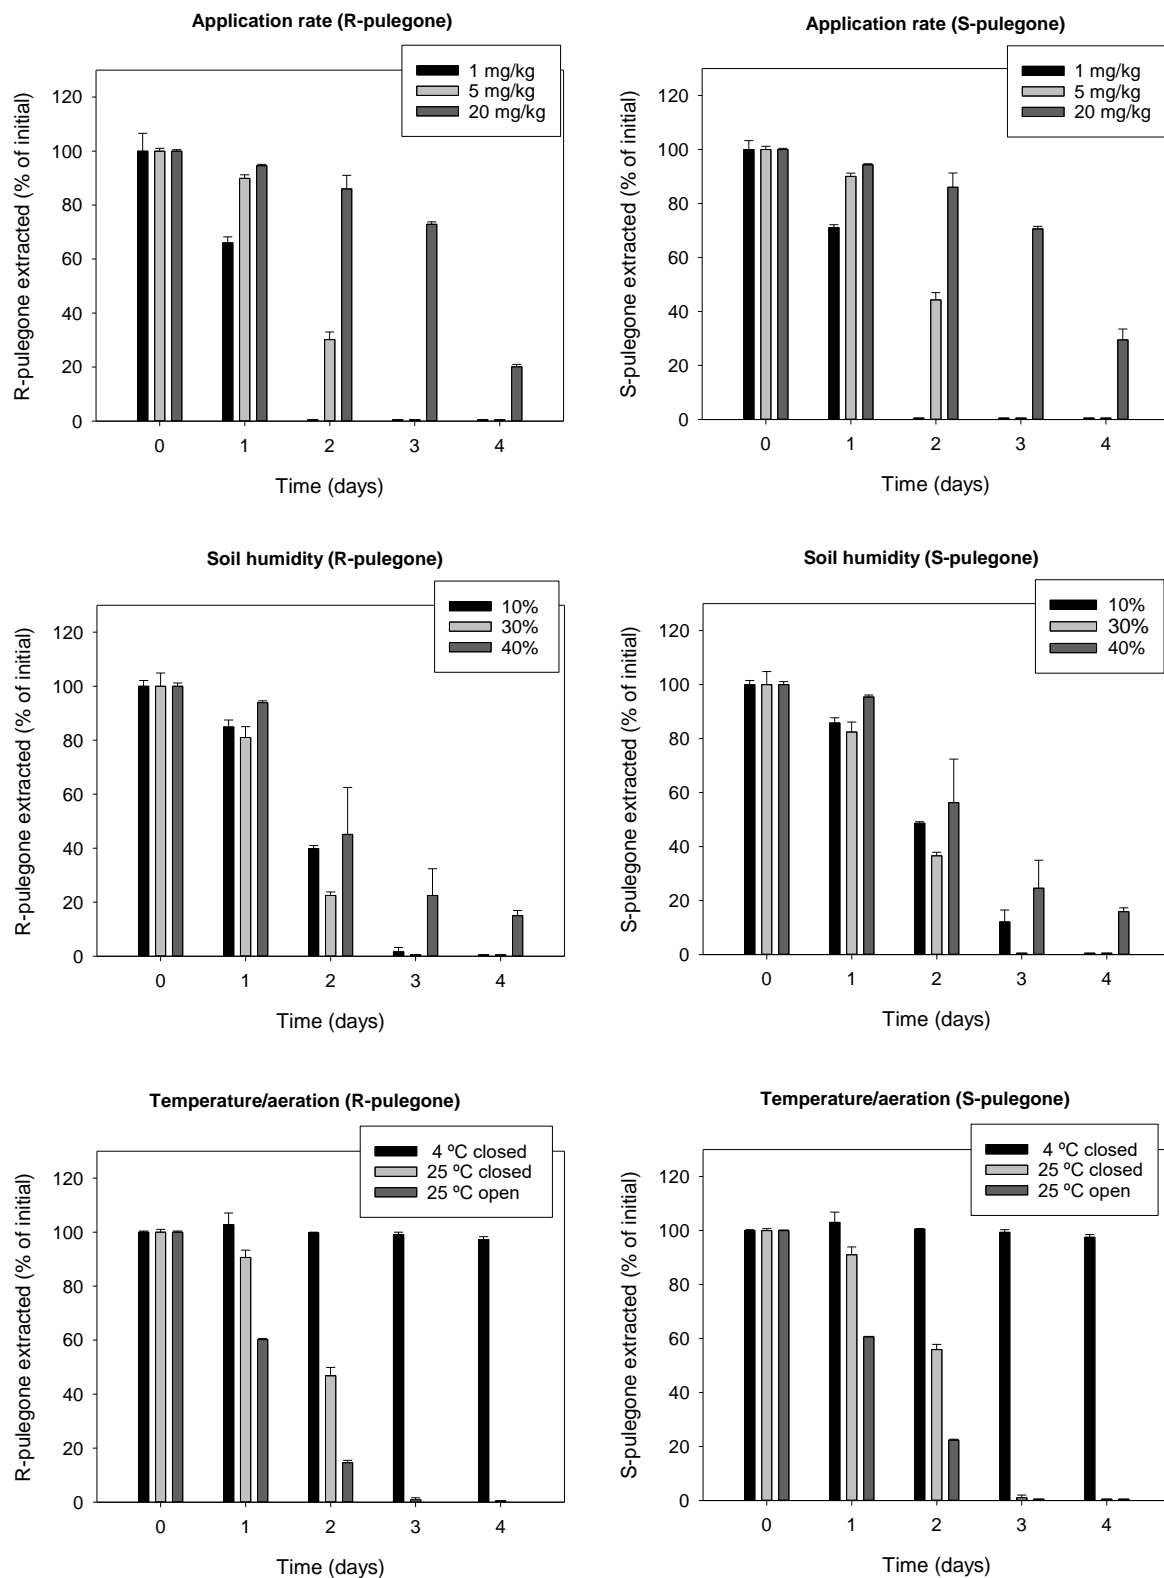

**Figure S1.** Effect of the application rate, soil water content, and temperature/aeration on the dissipation of R- and S-pulegone in soil 2. The different treatments are described in detail in Supplementary Text S1.

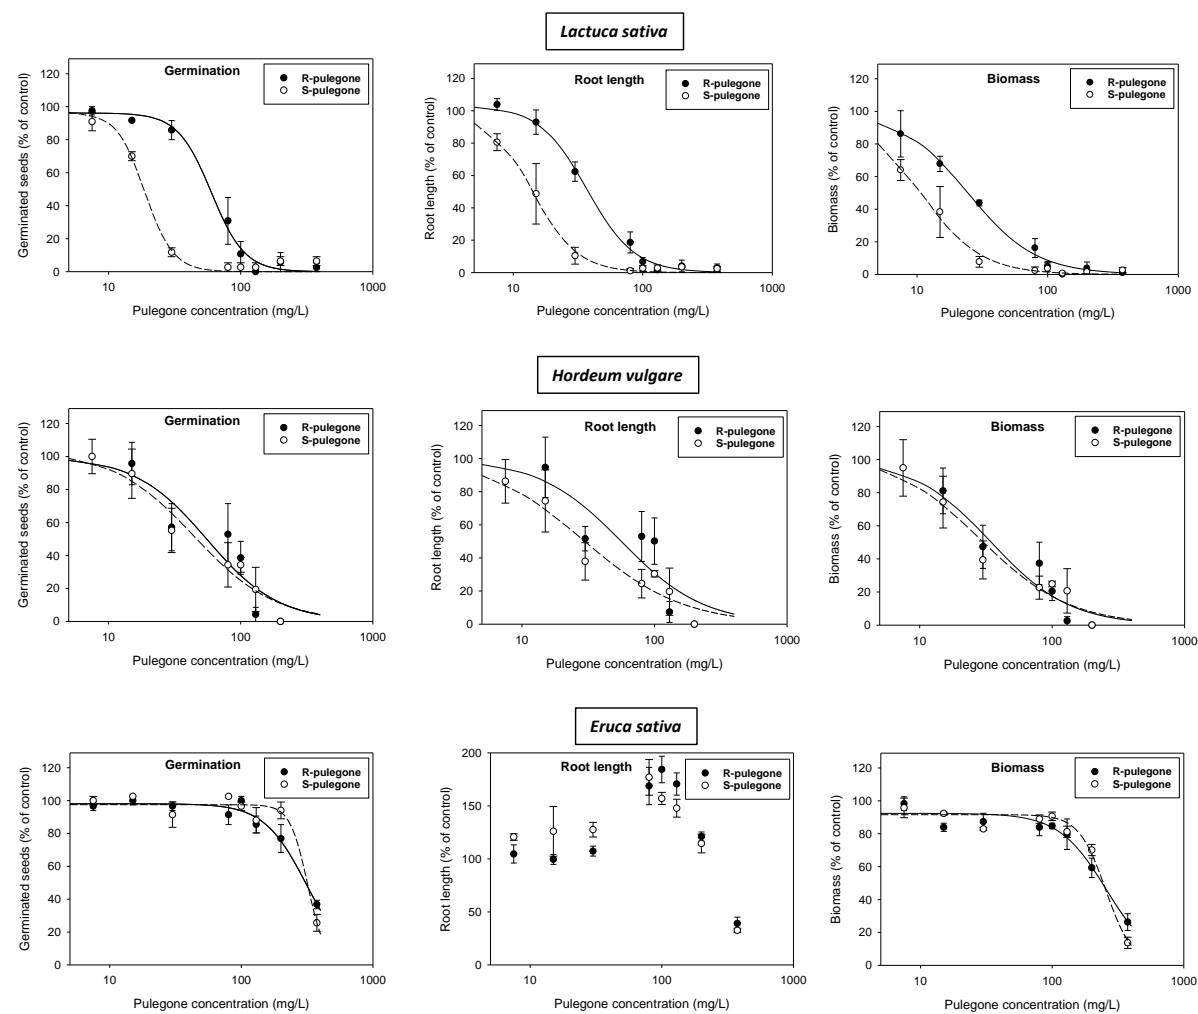

**Figure S2.** Dose-response curves of R- and S-pulegone on germination, root length, and shoot biomass of three plant species obtained in Petri dishes after 5 days. Symbols represent experimental percentages compared to the control, whereas lines are the log-logistic 3-parameter fits.

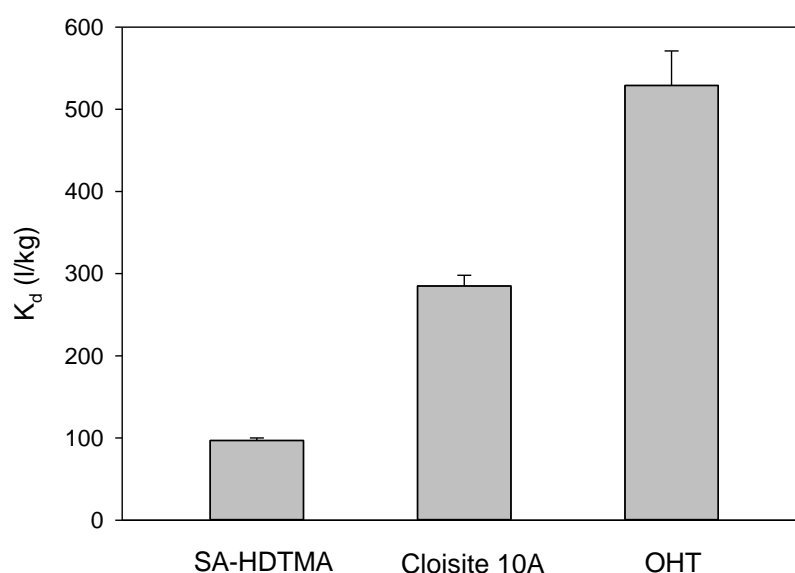

**Figure S3.** Distribution coefficients for rac-pulegone on different organoclays. SA-HDTMA: Arizona montmorillonite modified with hexadecyltrimethylammonium cations (lab-synthesized); Cloisite 10A: montmorillonite modified with dimethyl, benzyl, hydrogenated alkyl tallow quaternary ammonium cations (commercial); OHT: Oleate-modified hydrotalcite (lab synthesized). Measurements were conducted at an initial rac-pulegone concentration of 2 mg/l and an adsorbent to solution ratio of 40 mg:8 ml. Error bars denote standard errors of triplicates.

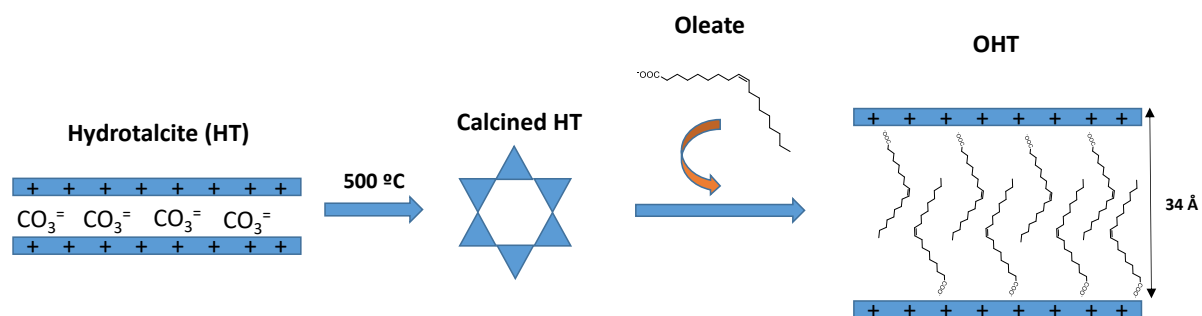

**Figure S4.** Schematic representation of the reactions leading to the formation of the oleate-modified hydrotalcite sample (OHT).



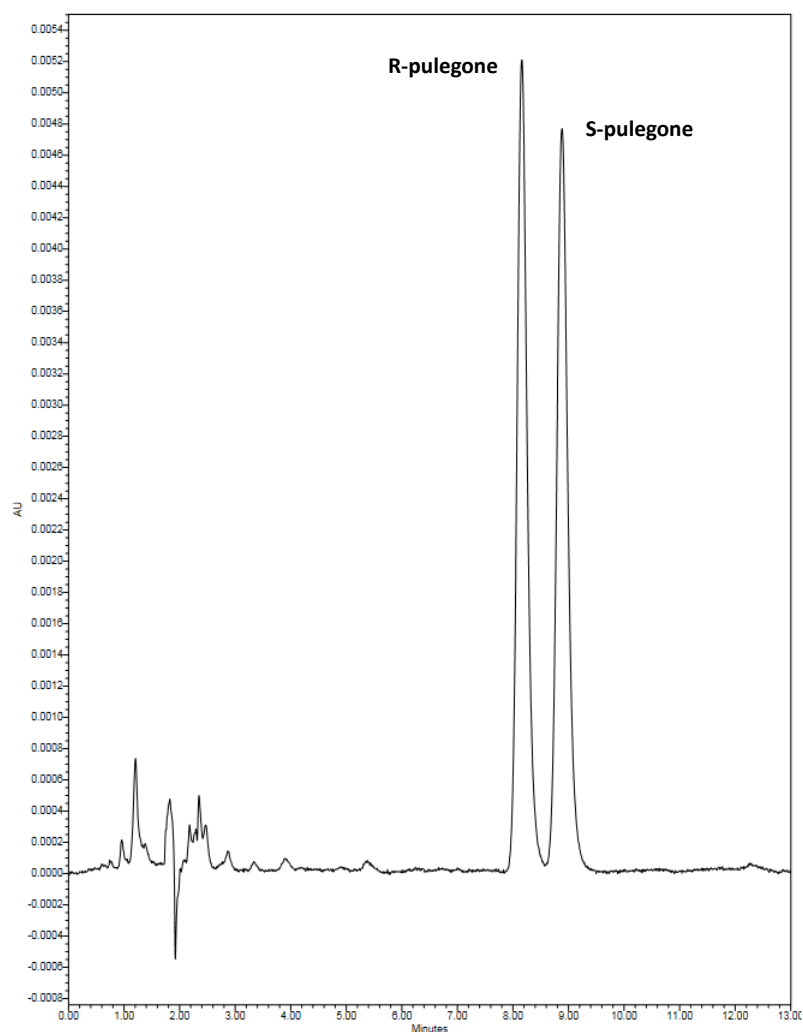

**Figure S5.** Chromatogram of a standard solution of rac-pulegone containing each enantiomer at a concentration of 1 mg/l in 50:50 methanol:water as a solvent.
